# Supplementary material
Source: publisher figshare collection journal article supplement (https://scielo.figshare.com/articles/dataset/_/6832742)
Supplement: Supplementary file 1 [file Table_1.xls]

## Sheet: Table_1
<b>Esp.</b>	<b>Ramo de pesquisa</b>	<b>Tempo com LWF</b>	<b>Formação</b>
A	Empresa fabricante de LWF no Brasil desde 2009	Desde 2010	Mestre na área de engenharia ambiental
B	Sindicato da indústria de Construção Civil	Desde 2008	Economista/Engenheiro Civil
C	Pesquisador acadêmico	Desde 2012	Doutor na área de arquitetura e urbanismo
D	Fornecedor de insumos para fabricação de LWF no Brasil desde 2008	Desde 2011	Arquiteto e Urbanista
E	Associação de empresas de base florestal	Desde 2009	Doutor na área de engenharia florestal
