# Supplementary material
Source: publisher figshare collection journal article supplement (https://scielo.figshare.com/articles/dataset/_/6832742)
Supplement: Supplementary file 2 [file Table_10.xls]

## Sheet: Table_10
<b>Estratégias</b>	<b>Pesquisa atual</b>	<b><a href="#B13">Hemstr&#246;m, Mahapatra e Gustavsson (2011)</a></b>	<b><a>Qu <em>et al.</em> (2012)</a></b>	<b><a href="#B20">Mahapatra, Gustavsson e Hemstr&#246;m (2012)</a></b>	<b><a href="#B14">Humerkoski, Jonsson e Nord (2015)</a></b>
Regulamentar/Estabelecer normas e políticas adequadas para o desenvolvimento do mercado e meio ambiente	X	X	X
Apresentar mais exemplos do LWF de forma a incentivar a cadeia de suprimentos a se mobilizar para isso	X	X
Divulgar/Educar (população e profissionais de modo geral) mais sobre as propriedades da madeira. Apresentar como fonte renovável e sustentável.Divulgar a durabilidade da madeira, sua resistência a terremotos, suas propriedades acústicas e térmicas, etc.	X		X	X
Incentivar a plantação específica/setor madeireiro para uso da madeira na construção civil e desenvolvimento da indústria (plantio, colheita, operação, venda, etc.), trazendo mais tecnologia, a fim de melhorar a qualidade e o processamento da madeira	X		X	X
Mais fomentação da pesquisa na área com o objetivo de superar os preconceitos	X			X	X
Maior colaboração entre a indústria, o governo, pesquisadores e especialistas na área para disseminação e criação de uma rede mais sólida	X			X	X
Implantação de impostos sobre energia e carbono para internalizar os custos externos da produção de materiais de construção com o objetivo de melhorar a competitividade econômica da madeira como material estrutural				X	X
Acordos com governo e do setor para reduzir custos administrativos (impostos) com o objetivo de impulsionar o setor	X
