# Supplementary material
Source: publisher figshare collection journal article supplement (https://scielo.figshare.com/articles/dataset/_/6832742)
Supplement: Supplementary file 3 [file Table_2.xls]

## Sheet: Table_2
<b><strong>Amea&#231;as</strong></b>	<b><strong>Oportunidades</strong></b>
<u>Solu&#231;&#245;es t&#233;cnicas</u>: as solu&#231;&#245;es t&#233;cnicas adotadas precisam de revis&#227;o conforme as diferentes regi&#245;es do pa&#237;s, para garantir o total desempenho deste sistema.<br> <u>Crise no setor constru&#231;&#227;o civil</u>: o mercado de constru&#231;&#227;o civil brasileiro &#233; fortemente afetado pela crise pol&#237;tica e econ&#244;mica do pa&#237;s.<br>…	<u>Concorr&#234;ncia:</u> quanto maior a concorr&#234;ncia do sistema construtivo, melhor para o consumidor final (vantagem para a popula&#231;&#227;o), pois permite diminuir o pre&#231;o e proporciona mais possibilidades de componentes/elementos dispon&#237;veis no mercado,inclusive garantindo flexibilidade.<br> <u>Expans&#227;o dos programas de financiamento habitacional:</u> abertura de novas …
<strong>For&#231;a</strong>	<strong>Fraqueza</strong>
<u>Tempo da obra</u>: tempo de produ&#231;&#227;o &#233; menor se comparado com a alvenaria.<br> <u>A maior parte da constru&#231;&#227;o &#233; industrializada</u>: al&#233;m da economia de tempo, a industrializa&#231;&#227;o da constru&#231;&#227;o permite o controle da qualidade do servi&#231;o, a padroniza&#231;&#227;o dos processos e a redu&#231;&#227;o no consumo de materiais.<br> <u>Susten…	<u>Falta de conhecimento/preconceito</u>: devido principalmente &#224; falta de informa&#231;&#245;es quanto &#224; vida &#250;til, &#224; resist&#234;ncia dos materiais e &#224; impermeabiliza&#231;&#227;o, existe grande resist&#234;ncia da popula&#231;&#227;o em rela&#231;&#227;o &#224; utiliza&#231;&#227;o da madeira e de novas tecnologias para a constru&#231;&#227;o de moradias, o que dificul…
