# Supplementary material
Source: publisher figshare collection journal article supplement (https://scielo.figshare.com/articles/dataset/_/6832742)
Supplement: Supplementary file 4 [file Table_3.xls]

## Sheet: Table_3
<b>Fatores</b>	<b>Variáveis críticas identificadas na literatura</b>
<strong>Fatores Culturais/Sociais</strong>	Aceitação da madeira no ambiente construído por parte dos usuários.
	Falta de conhecimento por parte dos profissionais com relação ao material madeira e com relação ao próprio sistema LWF.
	Percepções negativas dos profissionais da indústria da construção em relação às propriedades da engenharia da madeira/falta de conscientização e educação de engenheiros e arquitetos da necessidade e potencial da utilização desse sistema construtivo no Brasil.
<strong>Fatores Operacionais</strong>	Falta de tecnologia no Brasil.
	Falta de integração da cadeia de suprimentos do setor da construção civil.
	Alta rotatividade de funcionários/<em>turnover</em> no setor.
	Mão de obra especializada/capacitada.
	Madeira de qualidade e/ou tratada e/ou certificada para fabricação dos <em>frames.</em>
	Falta de fornecedores de insumos no Brasil. A maior parte dos fornecedores são estrangeiros.
<strong>Fatores Organizacionais/Econ&#244;micos</strong>	Ausência de normas brasileiras.
	Falta de incentivo/interesse do setor da construção civil e do governo brasileiro em adotar o LWF (marketing/financiamento).
	Termos técnicos usados na grande maioria em língua inglesa.
	Poucas informações na literatura nacional.
	Concorrências com outros sistemas construtivos mais tradicionais.
<strong>Ambiental</strong>	Receio de existir desmatamento da floresta nativa.
	Necessidade de recursos e eficiência energética.
