# Supplementary material
Source: publisher figshare collection journal article supplement (https://scielo.figshare.com/articles/dataset/_/6832742)
Supplement: Supplementary file 5 [file Table_4.xls]

## Sheet: Table_4
<b>Variáveis Críticas selecionadas</b>
1	Aceitação da madeira no ambiente construído por parte dos usuários. Falta mostrar ao público comprador todos aspectos positivos que o uso da madeira pode trazer, como, por exemplo: menor quantidade de resíduos, conforto térmico maior, construção em ambiente fabril que vai resultar em melhor controle da execução da edificação, entre outros
2	Falta de conhecimento por parte dos profissionais com relação ao material madeira e com relação ao próprio sistema LWF/ Falta de conscientização e educação de engenheiros e arquitetos da necessidade e potencial da utilização desse sistema construtivo no Brasil. Percepções negativas dos profissionais da indústria da construção em relação às propriedades da engenharia da madeira
3	Madeira de qualidade e/ou tratada e/ou certificada para fabricação dos <em>frames</em>
4	Mão de obra especializada/capacitada
5	Ausência de normas brasileiras
6	Financiamento de construções em LWF
7	Falta de incentivo/interesse do setor da construção civil e do governo brasileiro em adotar o LWF (Marketing/Financiamento)
8	Falta de integração da cadeia de suprimentos do setor da construção civil
9	Seguro das edificações em LWF no Brasil
10	Concorrências com outros sistemas construtivos mais tradicionais
