# Supplementary material
Source: publisher figshare collection journal article supplement (https://scielo.figshare.com/articles/dataset/_/6832742)
Supplement: Supplementary file 6 [file Table_5.xls]

## Sheet: Table_5
<b>Cenários gerados</b>
<strong>Cen&#225;rio 1 - Pessimista</strong>	• Acredita-se que neste cenário haverá pouca fomentação dentro do setor da construção civil para incentivo do uso do sistema <em>wood frame</em> entre os profissionais e, por consequ&#234;ncia, haver&#225; pouca aceita&#231;&#227;o do uso da madeira no ambiente constru&#237;do por parte dos usu&#225;rios finais.<br>&#8226; Estagna&#231;&#227;o tanto da oferta de mat&#233;ria-prima madeira como da…
<strong>Cen&#225;rio 2 - Intermedi&#225;rio</strong>	• Considera-se que haverá maior fomentação do sistema por parte dos profissionais, o que, acredita-se, impulsionará a maior demanda/aceite do sistema por parte dos usuários.<br>&#8226; Estagna&#231;&#227;o tanto da oferta de mat&#233;ria-prima madeira como da oferta de m&#227;o de obra.<br>&#8226; Acredita-se que nos pr&#243;ximos anos novas normas regulamentadoras entrar&#227;o em vigor, o que, …
<strong>Cen&#225;rio 3 - Otimista</strong>	• Considera-se que haverá maior fomentação do sistema por parte dos profissionais, o que, acredita-se, impulsionará a maior demanda/aceite do sistema por parte dos usuários.<br>&#8226; Maior oferta de mat&#233;ria-prima madeira, assim como de m&#227;o de obra.<br>&#8226; As normas regulamentadoras do sistema ser&#227;o elaboradas e colocadas em pr&#225;tica, o que, sup&#245;e-se, proporcionar&#22…
