# Supplementary material
Source: publisher figshare collection journal article supplement (https://scielo.figshare.com/articles/dataset/_/6832742)
Supplement: Supplementary file 7 [file Table_6.xls]

## Sheet: Table_6
<b>Estratégias geradas</b>
<strong>Cen&#225;rio 1</strong>	• Desenvolvimento de uma política setorial de florestas plantadas em consonância com a cadeia produtiva do LWF<br>&#8226; Articula&#231;&#227;o setorial para a inser&#231;&#227;o do LWF em editais de obras govenamentais. Mais incentivo para o Programa Minha Casa, Minha Vida estimular obras com novos sistemas construtivos <br>&#8226; Articula&#231;&#227;o setorial para apresentar as vantagens comp…
<strong>Cen&#225;rio 2</strong>	• Articulação setorial para viabilizar programas de pesquisas na área de tecnologia da madeira, novos produtos, inovação, preservação da madeira, estruturas da madeira<br>&#8226; Pesquisa de sistemas de manejo e melhoramento gen&#233;tico para atendimento de nova demanda; <br>&#8226; Elabora&#231;&#227;o de leis que estimulem o uso de constru&#231;&#245;es sustent&#225;veis <br>&#8226; A&#231;&#2…
<strong>Cen&#225;rio 3</strong>	• Florestas manejadas para madeira estrutural ou componentes para a demanda da construção civil<br>&#8226; Empresas especializadas em componentes de madeira para a constru&#231;&#227;o civil<br>&#8226; Maior fiscaliza&#231;&#227;o da qualidade das obras<br>&#8226; Cria&#231;&#227;o de mecanismos de fiscaliza&#231;&#227;o mais espec&#237;ficos do que os que, j&#225; existem, para wood fram
