# Supplementary material
Source: publisher figshare collection journal article supplement (https://scielo.figshare.com/articles/dataset/_/6832742)
Supplement: Supplementary file 8 [file Table_7.xls]

## Sheet: Table_7
<b>Pesquisas</b>	<b>Objetivo</b>	<b>Método de pesquisa</b>	<b>Especialistas</b>
<strong>Estudo atual</strong>	Identificar as variáveis que influenciam a difusão do LWF no Brasil e através destas gerar cenários prospectivos	Estudo prospectivo- com especialistas e informações de fontes secundárias (Qualitativo)	Especialistas na area da construção civil e florestal
<strong><a href="#B13">Hemstr&#246;m, Mahapatra e Gustavsson (2011)</a></strong>	Identificar a percepção de arquitetos com relação à utilização do LWF na construção de prédios na Suécia	Uso de questionário Qualitativo e quantitativo	Especialistas na área de construção civil, mais em específico arquitetos
<strong><a>Qu <em>et al.</em> (2012)</a></strong>	Buscou compreender melhor as percepções de especialistas chineses com relação à difusão do LWF em casas	Uso de questionário Qualitativo e quantitativo	Especialistas construção civil e florestal
<strong><a href="#B20">Mahapatra, Gustavsson e Hemstr&#246;m (2012)</a></strong>	Analisar a influência de regulamentos, percepções e emergência ambientais com relação ao uso e prédios em LWF na Alemanha, Suécia e Reino Unido	Análise qualitativa da informação coletadas principalmente de fontes secundárias	-
<strong><a href="#B14">Humerkoski, Jonsson e Nord (2015)</a></strong>	Explorar o potencial do mercado prédios em LWF na Europa	Estudo prospectivo- análise de cenários Top-down e análise de difusão da inovação (Qualitativo)	-
