# Supplementary material
Source: publisher figshare collection journal article supplement (https://scielo.figshare.com/articles/dataset/_/6832742)
Supplement: Supplementary file 9 [file Table_8.xls]

## Sheet: Table_8
<b>Variáveis</b>	<b>Pesquisa atual</b>	<b><a href="#B13">Hemstr&#246;m, Mahapatra e Gustavsson (2011)</a></b>	<b><a>Qu <em>et al</em>. (2012)</a></b>	<b><a href="#B20">Mahapatra, Gustavsson e Hemstr&#246;m (2012)</a></b>	<b><a href="#B14">Humerkoski, Jonsson e Nord (2015)</a></b>
Madeira material de tradição para construção			X		X
Grandes área de plantações florestais	X		X
Disponibilidade de importação de madeira de países estrangeiros			X
O uso polivalente de recursos madeireiros é incentivado			X
Incetivos no ensino na área de construção em madeira pelas universidades e instituições			X
Incentivo ao ensino na área de construção em madeira (prédios) do governo, do setor florestal e do setor de construção civil		X
Aumento da investigação, exploração e utilização de áeas de madeira doméstica			X
Divulgação e incentivo de instituições estrangeiras para uso do sistema construtivo no país	X		X
Incentivo do governo para utilização de recursos naturais renováveis /vantagem ambiental do sistema construtivo/vantagem produtiva (flexibilidade, rapidez, redução de resíduos...)	X	X	X	X	X
Sistema construtivo apresenta futuro promissor para desenvolvimento no longo prazo /bons resultados identificados até o momento com relação a sua aplicação e utilização, tais como manutenção fácil, rapidez do processo, etc.			X	X	X
