# Supplementary material
Source: publisher figshare collection journal article supplement (https://scielo.figshare.com/articles/dataset/_/6832742)
Supplement: Supplementary file 10 [file Table_9.xls]

## Sheet: Table_9
<b>Variáveis</b>	<b>Pesquisa atual</b>	<b><a href="#B13">Hemstr&#246;m, Mahapatra e Gustavsson (2011)</a></b>	<b><a>Qu <em>et al.</em> (2012)</a></b>	<b><a href="#B20">Mahapatra, Gustavsson e Hemstr&#246;m (2012)</a></b>	<b><a href="#B14">Humerkoski, Jonsson e Nord (2015)</a></b>
Falta de políticas governamentais/ conscientização	X		X
Falta de profissionais qualificados/conscientização de profissionais	X	X	X		X
Falta de pesquisa na área/divulgação e uso do sistema construtivo, principalmente da madeira	X		X
Falta de madeira específica para construção / madeira de qualidade, plantada especificamente para construção de edificações	X		X
Falta de tecnologia avançada na área			X
Falta de interesse do setor da construção civil em investir na área, de investimentos para atender a esse sistema estrutura/integração do setorOs agentes da cadeia de suprimentos de modo geral não estão preparados para atender a esse sistema construtivo	X	X		X	X
Preconceito dos agentes da cadeia de suprimentos com relação às características da madeira para edificações - engenheiros, empreiteiros e arquitetos (resistência, estabilidade, durabilidade e vida útil da madeira), o que dificulta a competição com outras técnicas construtivas	X	X		X	X
Tradição do uso do concreto para construção civil em edifícios em geral (Brasil) e em prédios (nos outros estudos)	X	X			X
Seguro mais caro para edificações em madeira	X			X
Não aceitação da madeira no ambiente construído por parte dos usuários	X			X
Falta de desenvolvimento de normas para os produtos de construção em madeira, importante para assegurar a expansão substancial das construções de madeira	X			X	X
Variação das necessidades técnicas para construção conforme as diferentes regiões/falta de padrão	X		X		X
Custos mais elevados de manutenção das fachadas					X
